# Supplementary material
Source: MDPI journal article supplement (https://www.mdpi.com/1999-4907/7/9/199)
Supplement: s1 [file s1]

Supplementary Materials: Failure to Communicate: Inefficiencies in Voluntary Incentive Programs for Forest Owners in Michigan.

Mark D. Rouleau, Jennifer F. Lind-Riehl, Miranda Aho and Audrey L. Mayer

1. Interview Protocol and Questions for Agents at Land Management Agencies and Key Informants

1.1. Part A: Protocol

1.1.1. Recruitment, Selection of Participants and Voluntariness

The proposed study will focus on voluntary programs in eight rural counties in the Upper Peninsula of Michigan. Methodologically, the research will include: (1) mapping participation rates in six voluntary incentive programs among NIPF owners in the Western Upper Peninsula of Michigan (based on publically available data, including participant addresses) and analyzing spatial variation in participation across the study area; (2) conducting semi-structured interviews with key leaders involved in landowner organizations, forestry professionals, and other potential norm entrepreneurs; and (3) conducting semi-structured interviews with a broad cross-section of NIPF owners.

Leaders will be identified via a phone call to private forest owner organizations’ listed phone number and asked for an interview or to recommend an involved member of the organization for an interview. We anticipate that interviews would last 1–2 h. Questions would focus on the organization’s membership demographics, goals, suggestions for land management, affiliation with voluntary programs, level of contact with members and non-member NIPF owners, and geographic reach and level of influence in the local area. Interviews will be recorded, transcribed, and analyzed to understand each organization’s and professional’s unique social influence on land management and inclination to join a voluntary program.

We will also interview NIPF owners in the Western UP in a face-to-face setting. NIPF forest owners will be identified by overlaying GIS parcel maps over georectified Landsat remote sensing imagery to identify parcels with at least 5 acres covered by forest. These parcels represent the universe of NIPF owners in our study region, and we will sample from these landowners. Interviewees will be chosen using a stratified random sample method and by additional snowball sampling. Each of the eight counties in the study region will include at least 2 randomly selected voluntary program participants, which will be chosen from a random draw of participants in any of the six voluntary programs. In addition, each county will include at least 3 non-participants, chosen from a random draw of NIPF owners. Contact information for selected interviewees will be obtained from phone books, tax records, and other resources. If a selected interviewee cannot be reached, or refuses an interview, an additional randomly selected interviewee will be chosen as a replacement. Most likely, some of the selected participants will be full year residents, others may live in the area seasonally, and still others may be completely absentee owners. If at least 25% of the sample are not full year residents or if at least 25% of the sample are not absentee owners (either seasonal or fully absent), additional samples of the missing resident type will be chosen.

We will assure that participation is voluntary by first sending a letter to identified households notifying them of the research project and asking for participation. Next, we will telephone sampled households asking for their participation and scheduling a specific date/time/place for the interview to occur. Finally, participants will sign a consent form that will provide them with information on the risks and benefits of participating, their ability to leave the study at any time, and contact information for the research team. At any point in this process the participant may decide not to participate in the study.

1.1.2. Compensation

Participants will be compensated for their time and effort with a thank you gift of a Michigan Gazetteer.

1.1.3. Deception

There will be no deception in this project.

1.1.4. Privacy and Confidentiality

Participants will not be identified publically. Their names and addresses will be known to the research team, through the process of contacting them. However, we will not keep records of their names and addresses associated with responses to the interviews. Interviews will be recorded, but they will be documented with a pseudonym, rather than the respondent’s name or any other identifying information. Pseudonym keys will be kept separate from interview transcripts on a password protected computer.

No questions of a sensitive nature will be asked. Most questions will pertain to how the respondent manages their land and why. In a sense some of this information is “public” already in that an interested person could drive by their property and see for themselves with the plain eye how the land is managed. The only conceivable risk for criminal or civil liability would be if a respondent happened to disclose a crime to the interviewer. This is unlikely. But because the name will not be associated and the interviewer will be bound by confidentiality, there is little risk that this would ever be found out, even if it were disclosed. Risk to financial standing, employability, insurability, reputation or stigmatizing are minimal but could foreseeably occur if a respondent’s name was ever publically connected with political statements about land management, environmentalism, or government regulations. For this reason, we will keep all responses confidential and specifically NOT associate identifying information about respondents with audio recordings. We will destroy audio recordings after they are transcribed. We will keep pseudonynm keys separate from interview transcripts under a password protected computer and we will destroy the pseudonym key at the conclusion of the research project.

Audio recordings will be transcribed for analysis in house by members of our research team. All recordings will be destroyed after transcription. Any identifying information will be scratched from the transcripts. Data will be reported in aggregates (e.g., “the majority of landowners interviewed reported that…”) and sometimes using direct quotes. Participants will be sent a copy of the transcribed interview and will be welcome to contact the interviewer to make editorial changes or add comments. Quotes will never include any identifiable information with them or in the surrounding contextualizing text. If there is a case where authors feel as if a participant might be identified by peers because of some kind of contextual information, the authors will change details to make identification more difficult. Transcribed interviews will be kept for three years, without any identifying information.

1.1.5. Risks

Risks and precautions to minimize them are discussed above. There is no more than minimal risk in this project.

1.1.6. Benefits

Participants will also receive a copy of the research findings. The findings will help them to understand how and why other NIPF owners in the Western UP manage their lands. This will give them a context for how they might work with friends and neighbors toward common landscape goals. In addition, participants will be given information on available voluntary incentive programs that they could qualify to enroll in and will be counseled on how to do so, if they are interested. Enrollment in these programs could result in significant tax savings and help with land management.

Benefits to society revolve around the potential for this project to inform land use policy, to improve voluntary incentive programs (including boosting participation levels), and as a result to improve environmental management for social and environmental goals on a large segment of land that is currently controlled by non-industrial private landowners. Most likely, the project could provide important information about how the multiple individual land managers who are NIPF owners might be influenced or organized together to manage their land at a larger landscape level to better identify and accomplish public management goals.

1.2. Part B: Interview questions for Key Informants

1.2.1. Characteristics of landowner association, agency, or professional organization

(1) Which land management association(s), agencies, or organizations are you involved with, if any?

(2) Can you describe your responsibilities within th(-is)/(-ese) association(s)/agenc(-y)/(-ies)/organization(s) and your level of time commitment?

(3) What are the general demographics of the members of your organization?

(4) How do landowners typically hear about your organization? Do you advertise or recruit landowners, or do they generally come to you?

(5) What are the goals of your organization? Who set these goals and how were they set?

(6) What is your organization’s frequency of contact with members? Non-members?

(7) What is the geographic area over which your organization works?

(8) What is your organization’s level of support for voluntary forest management programs (e.g., know about the programs but do not inform or advertise them to the members, advocate certain programs, administer certain programs, etc.)

(9) What advice does your organization provide to forest owners regarding management activities and goals? What is the process for providing this advice (e.g., newsletters, workshops or seminars, visits to the property, etc.)?

1.3. Part C: Themes and Codes

Bureaucracy—Coordination with other agencies, delegating duties to other offices or agencies, referring landowners or other people to other agencies

Field offices—Field offices contact landowners

Foresters—Foresters deal with landowners, professionals seen as opinion leaders or bridges between a program bureaucracy and landowners

Loggers—(may be used interchangeably with Foresters) deal with landowners, professionals sometimes seen as opinion leaders, may provide bridge between program bureaucracy and landowners, may have more limited agenda than foresters

Multiple roles—Key informant has many positions within and outside the program

Conflicting agendas—Having multiple jobs with different goals pulls foresters, admin, etc., in different directions

Legal barriers—Too many legal steps in getting landowners enrolled, or outreach to landowners, establishing new programs or maintaining/updating existing ones

Program funding barrier—Funding for the program limits outreach, advertising, how many people can enroll, services provided, etc.

Budget cuts—Program funding has been reduced, so there is less to spend on staff, advertising, or outreach

Financial incentive barrier—Key informants think landowners see a lack of compensation

Small size—the program is small, which may limit the services they can provide, and possibly enrollment

Short staffed—lack of staff to provide advice and other services to landowners, insufficient personnel to direct/manage program

Unofficial aid—assistance provided to landowners without enrollment

1.3.1. Communication

Outreach—ways programs inform landowners (Social media, seminars, website, campaign, newsletter, mailing, workshops, property visits), program director or other staff initiate communication with landowners

No outreach—program director or other staff do not initiate communication with landowners; “They contact us”

Phone call—Contact with landowners is by phone

Electronic communication—contact with landowners is by email or through website

Referrals—contact person refers landowners to programs

Word of mouth—landowners are informed of programs through friends, neighbors etc.

Advertising—Making the program known to the public through ads on the radio, newspapers, fliers, flier in tax bill, etc.

Marketing/PR—Showing the program in a positive light by presenting success stories, getting showpiece lands etc.

1.3.2. Landowner Characteristics

Demographics—types of people in the area

Governmental distrust—key informants perceive landowners as being antigovernment and explains why enrollment is low. Landowners do not want government to take control or limit what landowners can do on their own land

Family influence—Family members affect decisions to enroll and may be a barrier

1.3.3. Key Informant Characteristics

Disapproval of VIPs—Key informant does not approve of VIPs

Optimistic—Key informant seems optimistic about VIP success

Pessimistic—Key informant seems pessimistic about VIPs
